# Supplementary material for: Metabolic Engineering of Bacillus subtilis for High-Yield Surfactin Production
Source: Research Square preprint supplement (doi:10.21203/rs.3.rs-8541868/v1), 2026-01-23
Supplement: Supplementary file 1 [file 13e141d344c3b28bdd8ff6cd.docx]

Figure S1

(A) Surfactin production by TP1 and OP43yerP after 96 h of fermentation. (B) Semi-quantitative RT-PCR results of *yerP* gene transcription levels in strains TP1 and OP43yerP at 24 h (logarithmic phase) and 48 h (stationary phase). The 16S rRNA gene was used as an internal control. Lanes 1 and 7: TP1 RNA (no‑RT control); lanes 2 and 8: OP43yerP RNA (no‑RT control); lanes 3, 5, 9 and 11: TP1 cDNA; lanes 4, 6, 10 and 12: OP43yerP cDNA. Error bars indicate standard deviation of triplicate biological replicates; *p*-values calculated by t-test; ns: no significant.


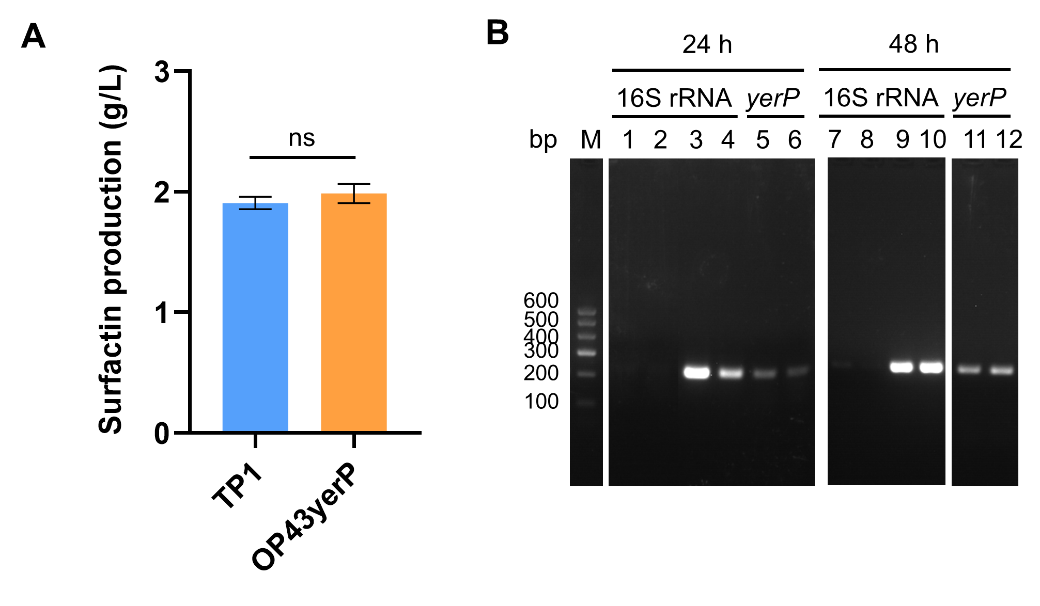


Figure S2

Western Blot analysis of IrrE-6×His expression in *Bacillus subtilis* strains TP1 and OP*43L-irrE*. Protein fractions include: W, whole-cell protein lysates; S, soluble supernatant fractions after sonication; I, insoluble pellet fractions after sonication.


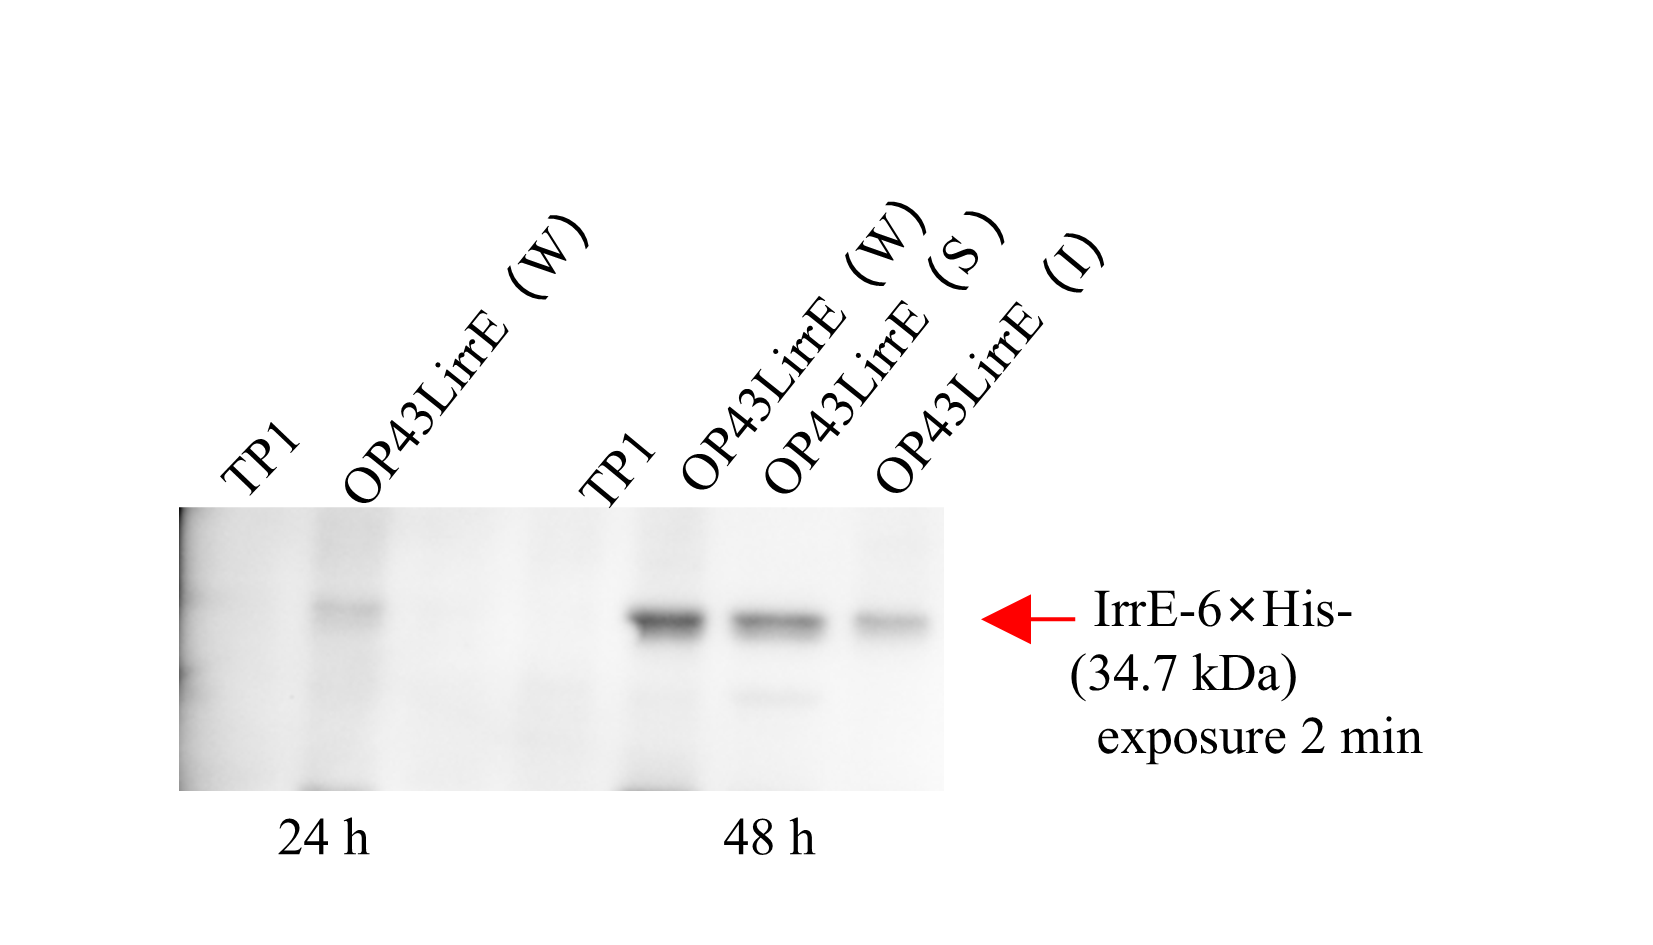


Table S1

| **Gene** | **Sequence(5’to3’)** |
| --- | --- |
| *irrE* | GTGCCTTCAGCAAATGTTTCACCGCCGTGTCCGTCAGGCGTTCGTGGAGGAGGAATGGGACCGAAAGCAAAAGCAGAAGCATCAAAACCGCATCCGCAAATTCCGGTGAAACTGCCGTTTGTTACAGCACCGGATGCGCTTGCAGCGGCAAAAGCAAGAATGAGAGATCTGGCAGCAGCATACGTTGCAGCACTGCCGGGAAGAGATACACATTCACTGATGGCGGGCGTTCCTGGCGTTGATTTAAAATTTATGCCGTTAGGCTGGCGGGATGGCGCGTTTGATCCTGAACATAATGTTATTCTTATCAACTCAGCAGCGAGACCGGAAAGACAAAGATTTACACTGGCACATGAAATTGGCCATGCGATTCTGTTGGGAGATGATGATCTGCTTAGCGATATTCATGATGCATACGAAGGCGAAAGACTGGAACAAGTGATTGAAACACTGTGCAATGTTGCTGCAGCAGCGATCCTGATGCCGGAACCTGTTATTGCGGAAATGCTGGAAAGATTTGGCCCGACAGGAAGAGCGTTAGCAGAACTTGCAAAAAGAGCGGAAGTTAGCGCGTCATCAGCACTTTATGCACTGACAGAACAAACACCGGTGCCGGTTATTTATGCAGTGTGTGCGCCGGGCAAACCGCCTAGAGAACAAGCAGCCTCAGATGAAGATGCAGGACCGTCAACAGAAAAGGTTCTTACAGTTAGAGCATCATCATCAACAAGAGGAGTTAAATATACACTGGCATCAGGAACACCTGTCCCGGCAGATCATCCGGCAGCATTAGCACTTGCAACAGGCATGGAAGTGAGAGAAGAAAGCTATGTTCCGTTTCGCAGCGGCAGAAAAATGAAAGCAGAAGTGGATGCATATCCGTCAAGAGGAATTGTTGCAGTTTCATTTGAATTTGATCCGGCAAGACTGGGCAGAAAAGATTCAGAACAAGCAGATAGAGATGAACCGCAAGATGCAGCACAATAA |

Table S2

| **Primers** | **Sequences** 5’-3’ | **Function** |
| --- | --- | --- |
| PE-F | catgccatggccaaaatcccttaacgtgag | pE-P43 Linearization |
| PE-M3-R | gctctagatgattaattaattcagaacgctcggtttcggccgggcgttttttttgcagaattcgcatcacacgca |
| P43-F | gttaagggattttggccatggtgataggtggtatgttttcgc | P43, P43L, P43N and P43NL amplification |
| P43-R | gtgtacattcctctcttacctat |
| P43-F2 | gttaagggattttggccatggggatatgaccatatgacgaaag |
| P43-R2 | tttatattttacataatcgcgcg |
| ansZ-F | ggtaagagaggaatgtacacatgaaaaaacaacgaatgctcg | *andZ* amplification, 6×His |
| ansZ-F2 | gcgattatgtaaaatataaatcatatggatgtaaggagagaa |
| ansZ-R2 | ctgaattaattaatcatctagatcagtggtgatgg  tgatgatgatactcattgaaataagcttgg*a* |
| irrE-F | ggtaagagaggaatgtacacgtgccttcagcaaatgtttc | *irrE* amplification, 6×His |
| irrE-R2 | ctgaattaattaatcatctagattagtggtgatgg  tgatgatgttgtgctgcatcttgcg |
| zwf-F | ggtaagagaggaatgtacacgtgaaaacaaaccaacaacc | *zwf* amplification |
| zwf-F2 | gcgattatgtaaaatataaatgtactaaaataaagcttcgaa |
| zwf-R | tgaattaattaatcatctagttatatattccaccagtgtaagc |
| PE-WF | tcctttgatcttttctacgg | overexpression plasmid verification |
| PE-WR | ccccctatgttttctcccctaa |
| tas-N20-F | tacgaataaaaggggagcttacca | *tas* N20 |
| tas-N20-R | aaactggtaagctccccttttatt |
| tas-UF | gccaataaggcctttaaatcaacttaagagtgtcaacg | homology arm of *∆tas* amplification |
| tas-UR | ttaatggagttgccttgatatttatatcggaaaattgtaagcatagtg |
| tas-DF | ataaatatcaaggcaactccat |
| tas-DR | aagattatttcttaaggagatttaccagaatgtatga |
| tas-qF | tctttcgattcggcatgt | *∆pps* verification |
| tas-qR | gatccgaatccaatgaaaat |
| eps-N20-F | tacgcgacactagcgaaatttcga | *eps* N20 |
| eps-N20-R | aaactcgaaatttcgctagtgtcg |
| eps-UF | ggccaataaggccttgtgccttttactttgccgta | homology arm of *∆eps* amplification |
| eps-UR | cagccttgacgtttccaccgattcgttggaacgtgctgctatact |
| eps-DF | cgaatcggtggaaacgtcaag |
| eps-DR | aagattatttcttaatcccgtctctactgaaagc |
| eps-qF | gtgacagcaaatcagacggc | *∆eps* verification |
| eps-qR | ggtctaggatgaagagccgc |
| pps-N20-F | tacggctcagctgttaagcaaggg | *pps* N20 |
| pps-N20-R | aaaccccttgcttaacagctgagc |

| **Primers** | **Sequences** 5’-3’ | **Function** |
| --- | --- | --- |
| pps-UF | ggccaataaggcctttcgatcaagatggcacaccaa | homology arm of *∆pps* amplification |
| pps-UR | agagggtaaaaggctgaaaaagcagaacattgacataccga |
| pps-DF | ttttcagccttttaccctct |
| pps-DR | aagattatttcttaatgctttgtcgaaccttccaac |
| pps-qF | ttttacgccgacaccgaca | *∆pps* verification |
| pps-qR | attggggatcaaatcgctgt |
| bac-N20-F | tacgcgaagccgatgcagaatgtg | *bac* N20 |
| bac-N20-R | Aaaccacattctgcatcggcttcg |
| bac-UF | ggccaataaggcctttaaatcgaatctcaatgcgga | homology arm of *∆bac* amplification |
| bac-UR | cccgcaaagatgttcgttaagcgaaagagcataacatcca |
| bac-DF | ttaacgaacatctttgcggg |
| bac-DR | aagattatttcttaatgctgaaagtccctcgtgta |
| bac-qF | agaccagcatttttccctcgt | *∆bac* verification |
| bac-qR | tacataccggggcaaggtga |
| pks-N20-F | tacgtgaagttttatacagaacgg | *pks* N20 |
| pks-N20-R | aaacccgttctgtataaaacttca |
| pks-UF | ggccaataaggccttttgcgataccgttcaatcca | homology arm of *∆pks* amplification |
| pks-UR | gctctagagcttaaaacatcttcgtcagcggg |
| pks-DF | aagatgttttaagctctagagccatctatcagccattgacgg |
| pks-DR | aagattatttcttaatctcaataggtgcaggacgag |
| pks-qF | gcggtaaaggtccacaccag | *∆pks* verification |
| pks-qR | gattccttcaagtcgctgcc |  |
| bcap-N20-F | tacgggtgaacatcgggacgctgt | *bcap* N20 |
| bcap-N20-R | aaacacagcgtcccgatgttcacc |
| bcap-UF | ggccaataaggccttacttagacgagcattcggac | homology arm of *∆bcap* amplification |
| bcap-UR | acagccacactaggaagcgaacaattcagaacaaaaatccctgtgc |
| bcap-DF | attgttcgcttcctagtgtg |
| bcap-DR | aagattatttcttaagtgtcggtccttcatttgg |
| bcap-qF | aagaaccgcagcatcaggac | *∆bcap* verification |
| bcap-qR | gtccccttttccgattgtgg |  |
| codY-N20-F | tacgagctggtttaacaacaattg | *codY* N20 |
| codY-N20-R | aaaccaattgttgttaaaccagct |  |
| codYR214C-UF | gggccaataaggccttcctgacgaatgaagaagcaa | homology arm of C*codYR214C* amplification |
| codYR214C-UR | caataacagagcaggtaatgccg |
| codYR214C-DF | cggcattacctgctctgttattg |
| codYR214C-DR | gaagattatttcttaatacgatgtatctccgctcg |
| codY-UF | gggccaataaggccttcctgacgaatgaagaagcaa | homology arm of *∆codY* amplification |
| codY-UR | gtgcgttcacaataacagaacgggtactcttcagggaattgacga |
| codY-DF | acccgttctgttattgtgaacg |
| codY-DR | aagattatttcttaactgaagggagaccattttcc |

| **Primers** | **Sequences** 5’-3’ | **Function** |
| --- | --- | --- |
| yerP-N20-F | tacgagtgaatgcggcatttcgaa | *yerP* N20 |
| yerP -N20-R | aaacttcgaaatgccgcattcact |
| yerP -DF | ttcgtcatatggtcatatccatgtctatgaacaaaatgaa | homology arm of *yerP* promoter replacement amplification |
| yerP -DR | aagattatttcttaagcaccatttcttctaagatc |
| yerP -UF | ggccaataaggccttctaccgtattcgcatcgtt |
| yerP -UR | ggtaagagaggaatgtacacatgaaccacgttattaatttcg |
| yerP -UR2 | gcgattatgtaaaatataaaaatgaccagtcagtcaataa |
| yerP -qF | catgtcgagagttgcgctgt | *yerP* promoter replacement verification |
| yerP -qR | gctaaacaagcgtctaactgg |
| pJ-F | taattaacatctcaaatttcgca | CRISPR-Cas9 Plasmid verification |
| pJ-R | catcaatccatcactggtctt |
| irrE-ZH-F | gaagatgttttaagctggcatggggatatgacca | P43-21-irrE amplification |
| irrE-ZH-R | tggctgatagatggcttgcaaaaaaaacgcccggccgaaaccgagcgttctgaattaattaatcatctttattgtgctgcatcttgcg |
| zwf-ZH-F | cgcaaagatgttcgttaaggccatggggatatgacca | P43-21-zwf amplification |
| zwf-ZH-R | gatgttatgctctttcgcgaattctgcaaaaaaaacgcc |
| qRT-16s-F | cgaggttaagccaatcccac | 16s RT-PCR |
| qRT-16s-R | ggctggctcctaaaaggtta |
| qRT-yerP-F | gtatgtgagctgcatcgttt | *yerP* RT-PCR |
| qRT-yerP-R | tgcgcctattaaagcgaaag |
| qRT-ansZ-F | atgggcttcgtcggaacaat | *ansZ* qRT-PCR |
| qRT-ansZ-R | acagcagcgtcaaacaggta |
